# Supplementary material for: Screening for Parasitic Infection and Tuberculosis in Immunosuppressed and Pre-Immunosuppressed Patients: An Observational Study
Source: MDPI journal article supplement (doi:10.3390/tropicalmed6030170), 2021-09-21
Supplement: s1 [file s1]

**Supplementary Materials 1: List of Immunomodulatory or Immunosuppressive Treatment in Alphabetic Order.**

|              |                  |                   |                                       |               |
|--------------|------------------|-------------------|---------------------------------------|---------------|
| abatacept    | belimumab        | daclizumab        | leflunomide                           | rituximab     |
| adalimumab   | basiliximab      | dimethyl fumarate | 6-mercaptopurine                      | secukinumab   |
| alemtuzumab  | baracitinib      | eculizumab        | methotrexate                          | sirolimus,    |
| anakinra     | canakinumab      | etanercept        | mycophenolate                         | tacrolimus    |
| apremilast   | certolizumab     | everolimus        | ocrelizumab                           | teriflunomide |
| atacept      | cyclosporine     | golimumab         | omalizumab                            | tocilizumab   |
| azathioprine | cyclophosphamide | infliximab        | prednisone-equivalent $\geq$ 20mg/day | ustekinumab   |
